# Supplementary material for: Socioeconomic Status, Structural and Functional Measures of Social Support, and Mortality: The British Whitehall II Cohort Study, 1985–2009
Source: PubMed Central journal article supplement — Am J Epidemiol. 2012 Apr 24;175(12):1275–83. doi: 10.1093/aje/kwr461 (PMC3372313; doi:10.1093/aje/kwr461), 2012-04-24
Supplement: supp_kwr461_kwr461_Web_Appendix.pdf [file supp_kwr461_kwr461_Web_Appendix.pdf]

**SOCIAL LIFE**

43. This section concerns people in your life who you feel close to and from whom you can obtain support (either emotional or practical) including close relatives and good friends.

How many people do you feel very close to? (It does not matter where they live or whether you have seen them recently.)

PLEASE WRITE NUMBER IN THIS BOX

Who have you felt closest to in the last 12 months? Please describe in terms of their relationship to you: (e.g. WIFE, SON, AUNT, BOYFRIEND, MALE FRIEND, FEMALE FRIEND). Remember these are just examples and we would like you to write in whoever you feel closest to. If you feel close to more than one person, please list two below:

WRITE IN THE PEOPLE YOU ARE CLOSEST TO HERE:

Closest person \_\_\_\_\_

Second person \_\_\_\_\_

*Only one person on each line, please.*

On the opposite page please tell us how you would rate the practical and emotional support each of the people you have listed above provides for you. (Each column refers to one of the people you listed above).

Rate each person on the scale from 1 - 4 to show how well they have provided each stated type of support from (a - o) **IN THE LAST 12 MONTHS.**

Not at all      A little      Quite a lot      A great deal  
1                      2                      3                      4

for example:-

If the person you are closest to is your wife and the second a male friend, the columns on the next page might look like this:-

Write in the people you are closest to here:-

| Closest Person | Second Person      |
|----------------|--------------------|
| <i>Wife</i>    | <i>Male friend</i> |
| <i>4</i>       | <i>2</i>           |

a) How much in the last 12 months... did this person give you information, suggestions, and guidance that you found helpful?

e.g. "a great deal" from wife, "a little" from friend. Of course, these are only examples. Please complete each question (a) - (o) on the 1 - 4 scale for the person or two people you listed above.

This section is about major and minor practical support. Rate each person on the scale from 1 - 4 to show how well they provided each type of support:  
 1 = not at all. 2 = a little. 3 = quite a lot. 4 = a great deal.

Write in the people you are closest to here:-

|                                                                                                                                                                   | Closest Person | Second Person |
|-------------------------------------------------------------------------------------------------------------------------------------------------------------------|----------------|---------------|
| l) How much in the last 12 months... did you need practical help from this person with major things (e.g. look after you when ill, help with finances, children)? |                |               |
| m) How much in the last 12 months... did this person give you practical help with major things?                                                                   |                |               |
| n) How much in the last 12 months... would you have liked more practical help with major things from this person?                                                 |                |               |
| o) How much in the last 12 months... did this person give you practical help with small things when you needed it? (e.g. chores, shopping, watering plants etc.)  |                |               |

We would also like a few details on each of these people:-

Write in the people you are closest to here:-

|                                                                       | Closest Person | Second Person |
|-----------------------------------------------------------------------|----------------|---------------|
| p) How old are they? (in years)                                       |                |               |
| q) What sex are they? (male/female)                                   | M F            | M F           |
| r) How long have you known them? (in years)                           |                |               |
| s) Do they work with you? (Yes/No)                                    | Y N            | Y N           |
| t) About how many days did you see them in the last year (1 - 365)    |                |               |
| u) How close do they live to you? (with you, or number of miles away) |                |               |

45. How often do you see anyone from work, socially out of work hours? (Excludes casual lunchtime meeting)
- |                       |   |
|-----------------------|---|
| Almost daily          | 1 |
| About once/week       | 2 |
| About once/month      | 3 |
| Once every few months | 4 |
| Never/almost never    | 5 |

46. a) Do you have any friends or acquaintances you visit or who visit you? (not necessarily the same person each time)
- |                       |   |
|-----------------------|---|
| Almost daily          | 1 |
| About once/week       | 2 |
| About once/month      | 3 |
| Once every few months | 4 |
| Never/almost never    | 5 |

- b) How many friends or acquaintances do you see once a month or more?
- |              |   |
|--------------|---|
| None         | 1 |
| 1 - 2        | 2 |
| 3 - 5        | 3 |
| 6 - 10       | 4 |
| More than 10 | 5 |

47. How often do you attend religious services? (apart from weddings and funerals)
- |                       |   |
|-----------------------|---|
| Almost daily          | 1 |
| About once/week       | 2 |
| About once/month      | 3 |
| Once every few months | 4 |
| Never/almost never    | 5 |

48. a) Do you belong to any clubs or organisations? (Social or recreational groups, trade unions, commercial groups, professional organisations, political parties, sports clubs, cultural groups, pressure groups etc.)

Yes 1

No 2

If No, go to Question 49

If Yes,

- b) Taking all the above organisations together, how often do you attend?

- |                       |   |
|-----------------------|---|
| Almost daily          | 1 |
| About once/week       | 2 |
| About once/month      | 3 |
| Once every few months | 4 |
| Never/almost never    | 5 |

51. The following is a list of things that can happen to people. Try to think back over the past 12 months and remember if any of these things happened to you and, if so, how much you were upset or disturbed by it:

|                                                                             |     |   | Very<br>much | Moderately | Not too<br>much | Not at<br>all |
|-----------------------------------------------------------------------------|-----|---|--------------|------------|-----------------|---------------|
| a) Personal serious illness,<br>injury or operation                         | Yes | 1 |              |            |                 |               |
|                                                                             | No  | 2 |              |            |                 |               |
| If Yes,                                                                     |     |   |              |            |                 |               |
| How much did it upset you?                                                  |     |   | 1            | 2          | 3               | 4             |
| b) Death of close relative or friend                                        | Yes | 1 |              |            |                 |               |
|                                                                             | No  | 2 |              |            |                 |               |
| If Yes,                                                                     |     |   |              |            |                 |               |
| How much did it upset you?                                                  |     |   | 1            | 2          | 3               | 4             |
| c) Serious illness, injury or<br>operation of a close relative<br>or friend | Yes | 1 |              |            |                 |               |
|                                                                             | No  | 2 |              |            |                 |               |
| If Yes,                                                                     |     |   |              |            |                 |               |
| How much did it upset you?                                                  |     |   | 1            | 2          | 3               | 4             |
| d) Major financial difficulty                                               | Yes | 1 |              |            |                 |               |
|                                                                             | No  | 2 |              |            |                 |               |
| If Yes,                                                                     |     |   |              |            |                 |               |
| How much did it upset you?                                                  |     |   | 1            | 2          | 3               | 4             |
| e) Divorce, separation or break up<br>of personal intimate relationship     | Yes | 1 |              |            |                 |               |
|                                                                             | No  | 2 |              |            |                 |               |
| If Yes,                                                                     |     |   |              |            |                 |               |
| How much did it upset you?                                                  |     |   | 1            | 2          | 3               | 4             |
| f) Other marital or family problem                                          | Yes | 1 |              |            |                 |               |
|                                                                             | No  | 2 |              |            |                 |               |
| If Yes,                                                                     |     |   |              |            |                 |               |
| How much did it upset you?                                                  |     |   | 1            | 2          | 3               | 4             |
| g) Any mugging, robbery, accident<br>or similar event                       | Yes | 1 |              |            |                 |               |
|                                                                             | No  | 2 |              |            |                 |               |
| If Yes,                                                                     |     |   |              |            |                 |               |
| How much did it upset you?                                                  |     |   | 1            | 2          | 3               | 4             |
| h) Change of job or residence                                               | Yes | 1 |              |            |                 |               |
